# Supplementary material for: Efficacy of companion-integrated childbirth preparation for childbirth fear, self-efficacy, and maternal support in primigravid women in Malawi
Source: PubMed Central journal article supplement (PMC6975021; doi:10.1186/s12884-019-2717-5), 2020-01-21
Supplement: 12884_2019_2717_MOESM1_ESM.pdf [file 12884_2019_2717_MOESM1_ESM.pdf]

## Companion-Integrated Childbirth Preparation study questionnaire

Participant Study Code.....

Date...../...../.....

### Part 1:

#### Demographic Data

*Please fill in the personal details and where necessary tick  one answer for each question, unless otherwise specified.*

1. Age: \_\_\_\_\_ (in years)
2. Marital status:
  - Married
  - Single
  - Separated
  - Divorced
  - Widowed
3. Tribe \_\_\_\_\_
4. Education Level:
  - Did not attend school
  - Primary Level
  - Secondary level
  - Tertiary level
5. Your occupation \_\_\_\_\_
6. Your partner's occupation \_\_\_\_\_
7. Estimated monthly income in Malawi Kwacha (*750 Malawi Kwacha ≈ \$1 USD*)
  - <10,000
  - 10,000-20,000
  - >20,000-30,000

**Part 2: Childbirth Attitude Questionnaire** (Adapted from Lowe, 1991). This tool is only available upon request from the developer.

**Part 3: Childbirth Self-Efficacy Inventory (CBSEI)** (Adapted from Lowe, 1991). This tool is only available upon request from the developer.

**Part 4: Birth Companion Support Questionnaire** (Adapted from Dunne, Fraser, & Gardner, 2014). This tool is only available upon request from the developer.

**Part 5. Checklist for pregnancy outcomes**

Participant Study Code.....

Date...../...../.....

**Review medical records for labour and delivery between 24-48 hours after childbirth**

| No | Item                                             | Observed (yes/no) or Values | Missing | Remarks |
|----|--------------------------------------------------|-----------------------------|---------|---------|
| 1  | Gestational age                                  |                             |         |         |
| 2  | Danger signs                                     |                             |         |         |
| 3  | Problems experienced                             |                             |         |         |
| 4  | Duration of the first stage of labour            |                             |         |         |
| 5  | Duration of the second stage of labour           |                             |         |         |
| 6  | Duration of the third stage of labour            |                             |         |         |
| 7  | Perineal trauma sustained                        |                             |         |         |
|    | • Intact                                         |                             |         |         |
|    | • Laceration                                     |                             |         |         |
| 8  | • Degree of tear                                 |                             |         |         |
|    | Apgar score at 1 minute                          |                             |         |         |
|    | • Normal (7/10 to 10/10)                         |                             |         |         |
| 9  | • Moderate (4/10 to 6/10)                        |                             |         |         |
|    | • Severe ( $\leq$ 3/10)                          |                             |         |         |
| 10 | Apgar's Score baby after birth                   |                             |         |         |
| 11 | Client's cooperation with care                   |                             |         |         |
| 11 | Initiates breastfeeding within 30min after birth |                             |         |         |
